RESEARCH ARTICLE

# *In vitro* comparison between $\alpha$ -tocopheryl acetate and $\alpha$ -tocopheryl phosphate against bacteria responsible of prosthetic and joint infections

Alessandro Bidossi<sup>1</sup>✉, Monica Bortolin<sup>1</sup>✉, Marco Toscano<sup>2</sup>, Elena De Vecchi<sup>1</sup>, Carlo L. Romano<sup>3</sup>, Roberto Mattina<sup>4</sup>, Lorenzo Drago<sup>1,2\*</sup>

**1** Laboratory of Clinical Chemistry and Microbiology, IRCCS Galeazzi Orthopaedic Institute, Milan, Italy, **2** Laboratory of Clinical Microbiology, Department of Biomedical Sciences for Health, University of Milan, Milan, Italy, **3** Department of Bone and Joint Infections and Reconstructive Surgery, IRCCS Galeazzi Orthopaedic Institute, Milan, Italy, **4** Department of Public Health, Microbiology and Virology, University of Milan, Milan, Italy

✉ These authors contributed equally to this work.

\* [lorenzo.drago@unimi.it](mailto:lorenzo.drago@unimi.it)

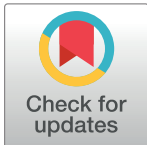

**OPEN ACCESS**

**Citation:** Bidossi A, Bortolin M, Toscano M, De Vecchi E, Romano CL, Mattina R, et al. (2017) *In vitro* comparison between  $\alpha$ -tocopheryl acetate and  $\alpha$ -tocopheryl phosphate against bacteria responsible of prosthetic and joint infections. PLoS ONE 12(7): e0182323. <https://doi.org/10.1371/journal.pone.0182323>

**Editor:** Martin Rottman, Harvard Medical School, UNITED STATES

**Received:** February 24, 2017

**Accepted:** July 17, 2017

**Published:** July 31, 2017

**Copyright:** © 2017 Bidossi et al. This is an open access article distributed under the terms of the [Creative Commons Attribution License](https://creativecommons.org/licenses/by/4.0/), which permits unrestricted use, distribution, and reproduction in any medium, provided the original author and source are credited.

**Data Availability Statement:** All relevant data are within the paper.

**Funding:** The authors received no specific funding for this work.

**Competing interests:** The authors have declared that no competing interests exist.

## Abstract

Biofilm-related infections represent a recurrent problem in the orthopaedic setting. In recent years, great interest was directed towards the identification of novel molecules capable to interfere with pathogens adhesion and biofilm formation on implant surfaces. In this study, two stable forms of  $\alpha$ -tocopherol, the hydrophobic acetate ester and the water-soluble phosphate ester, were tested *in vitro* as coating for titanium prosthesis. Antimicrobial activity against microorganisms responsible of prosthetic and joints infections was assessed by broth microdilution method. In addition,  $\alpha$ -tocopherol esters were evaluated for both their ability to hamper bacterial adhesion to and biofilm formation on sandblasted titanium surfaces. Results showed that only  $\alpha$ -tocopheryl phosphate displayed antimicrobial activity against the tested strains. Both esters were able to significantly interfere with bacterial adhesion and to prevent biofilm formation, especially by *Staphylococcus aureus* and *Staphylococcus epidermidis*. The activity of  $\alpha$ -tocopheryl phosphate was greater than that of  $\alpha$ -tocopheryl acetate. Alterations at membrane levels have been reported in literature and may be likely responsible for the interference on bacterial adhesion and biofilm formation shown by  $\alpha$ -tocopherol esters. Although further studies are needed to better investigate the mechanisms of action and the spectrum of activity of  $\alpha$ -tocopherol esters, these characteristics together with the positive effect on wound healing and immune response, make these molecules promising candidate for coating in order to prevent implant-associated infections.

## Introduction

The term Vitamin E refers to a group of tocopherols and tocotrienols, of which  $\alpha$ -tocopherol ( $\alpha$ -T) has the highest biological activity [1]. It is commonly known as a powerful fat-soluble

antioxidant which is known for its ability to reduce oxidative stress by quenching free radicals formed in the lipid phase of membranes or lipoproteins, affecting the development of cardiovascular diseases, cancers and neurological diseases [2] and positively influencing wound healing [3]. Furthermore, a great interest is directed towards its possible role in gene regulation and cellular signalling [3,4].

$\alpha$ -tocopheryl acetate (vitamin E acetate,  $\alpha$ -T-Ac) is the acetic ester of  $\alpha$ -T, a viscous, highly hydrophobic oil with a better stability than the unreduced form. This form is commonly used to treat atopic dermatitis and other skin diseases, where the acetate group has been found to be hydrolyzed, thus regaining the redox activity [5].

Recently, the use of Vitamin E on implant surfaces has been proposed to reduce the extent of microbial adhesion by changing the surface of the substratum and by affecting microbial adhesion process. In an *in vitro* experiment,  $\alpha$ -T-Ac embedded in poly-lactic acid has been demonstrated to alter bacterial adhesiveness and biofilm formation similarly to the non-ester form  $\alpha$ -T [6].

In addition, polyethylene embedded Vitamin E has been shown to reduce adhesion of biofilm-producing *Staphylococcus epidermidis*, *Staphylococcus aureus*, *Escherichia coli*, and *Candida albicans* isolated from biomaterial-associated infections [7–10], but intraspecies differences [10] and contrasting results have been reported [11]. A previous study has also demonstrated that Vitamin E causes a significant reduction of hydrophobicity of *E. coli*, being able to prevent the adhesion of this microorganism to nitrocellulose [12].

Bacterial adhesion to implant surface occurring over time during surgical implantation is determined by specific and non-specific interactions between microorganisms and material surface. The adhesion process occurring in the first hours and subsequent biofilm formation on implant surfaces mainly depends on the physicochemical interactions between substratum and microorganisms and are strongly influenced by the physical properties of the surface (roughness, hydrophobicity, electrostatic charge, coating) [13]. Therefore, great efforts are being made to dig out new and reliable strategies to avoid pathogen attachment to implants.

In recent years, a water-soluble form of  $\alpha$ -T,  $\alpha$ -tocopheryl phosphate (vitamin E phosphate,  $\alpha$ -T-P), has been detected in low amounts in human and animal tissues and plasma [14]. Since the hydroxyl group responsible for the antioxidant activity is phosphorylated in  $\alpha$ -T-P, this molecule should not have an antioxidant activity *per se*. Rezk *et al.* has proposed that this molecule acts as a pro-vitamin, still maintaining a very strong antioxidant activity and exhibiting some novel regulatory activities in the cells [15,16]. To our best knowledge, no studies have been carried out to assess the antibacterial activity of  $\alpha$ -T-P so far.

The present work aimed to evaluate the *in vitro* antimicrobial activity and efficacy in preventing adhesion and biofilm formation of  $\alpha$ -T-Ac and  $\alpha$ -T-P against microorganisms responsible for prosthetic and joints infections.

## Materials and methods

### Reagents

The following reagents were used:  $\alpha$ -tocopheryl acetate (Alfa Aesar, Heysham, UK) and  $\alpha$ -tocopheryl phosphate ( $\alpha$ -tocopherol phosphate disodium salt; Sigma-Aldrich, Milan, Italy). Stock solutions were prepared by dissolving  $\alpha$ -T-Ac in ethanol (500 mg/mL) and  $\alpha$ -T-P in sterile distilled water (250 mg/mL).

### Bacterial strains

Clinically relevant strains isolated from patients with prosthetic joint infections at the Laboratory of IRCCS Galeazzi Orthopaedic Institute were used in this study. Five strains each of *S.*

*epidermidis*, *S. aureus*, *Pseudomonas aeruginosa* and *Propionibacterium acnes* were included in the study. Strain identification was performed by using the Vitek<sup>®</sup> 2 Compact system (bioMérieux, Marcy l'Etoile, France), which settles colorimetric reagent cards that are incubated and interpreted automatically. The cards have 64 wells each containing an individual test substrate for measuring various metabolic activities (e.g. acidification, alkalization, enzyme hydrolysis, and growth in the presence of inhibitory substances). In particular, Vitek<sup>®</sup> GN ID card, Vitek<sup>®</sup> GP ID card, and Vitek<sup>®</sup> ANC ID card were used for microbial identification while antimicrobial susceptibility testing of staphylococci and *P. aeruginosa* was carried out on Vitek<sup>®</sup> AST 632 and 202 cards, respectively.

Strain identification was further confirmed through DNA sequencing of about 80 bp of variable regions V1 and V3 of the 16S rRNA gene by Pyrosequencing (PSQ96RA, Diatech, Jesi, Italy) as previously reported. Obtained sequences were pasted in BLAST to perform identification (<http://blast.ncbi.nlm.nih.gov/Blast.cgi>).

Strains were stored at  $-80^{\circ}\text{C}$  in proper broths enriched with 10% glycerol (VWR Chemicals, Leuven, Belgium) until testing.

### Antimicrobial activity by broth microdilution

The bacteriostatic and bactericidal activities of  $\alpha$ -T-Ac and  $\alpha$ -T-P were evaluated against the above-mentioned bacterial strains by assessing the Minimum Inhibitory Concentration (MIC) and the Minimum Bactericidal Concentration (MBC). The MIC, defined as the lowest concentration able to inhibit bacterial growth, was determined by broth microdilution method, in accordance with EUCAST guidelines [17] except for the use of Brain Heart Infusion broth (BHI; bioMérieux, Marcy l'Etoile, France) instead of Mueller Hinton broth. Briefly, for each strain a suspension with a density equal to 0.5 McFarland ( $1.5 \times 10^8$  CFU/mL) was prepared in BHI. To support growth of *P. acnes*, broth was supplemented with 5% defibrinated sheep blood (Liofilchem, Roseto degli Abruzzi, Italy). After proper dilutions, an aliquot from each suspension ( $10^5$  CFU/mL) was inoculated into a 96-wells microtiter plate containing 2-fold serial dilutions of  $\alpha$ -T-Ac and  $\alpha$ -T-P. Due to solubility limits, the maximum concentration used for both formulations was 200 mg/mL. Growth controls were performed by inoculating bacterial suspensions in BHI alone. MIC values were read after 24 h of incubation at proper conditions (except for *P. acnes* that was incubated for 48 h). The MBC was determined by plating 10  $\mu\text{L}$  from each well showing no turbidity onto Tryptic Soy Agar plates (TSA; Merck, Darmstadt, Germany) or Schaedler Blood Agar plates (SCH; bioMérieux, Marcy l'Etoile, France) in the case of *P. acnes*. TSA was incubated in aerobiosis at  $37^{\circ}\text{C}$  for 24 hours, while SCH was incubated at  $37^{\circ}$  for 48 hours in anaerobiosis. The anaerobic atmosphere was created in jars by anaerobic gas generating sachets (Oxoid<sup>™</sup> AnaeroGen<sup>™</sup> 2.5L, Thermo Scientific). After incubation at proper conditions, MBC was read as the lowest concentration able to kill 99.9% of the initial inoculum.

### Anti-adhesion properties on sandblasted titanium

The anti-adhesion activity of vitamin E was evaluated against one representative strain for each species. *P. acnes* was not included in these experiments because none of the tested isolates was able to adhere or to form biofilm in our *in vitro* setting. Sterile sandblasted titanium discs with a diameter of 25 mm and a thickness of 5 mm (Adler Ortho, Cormano, Italy) were used as substrate for bacterial adhesion. Discs were coated by spreading uniformly the proper amount of  $\alpha$ -T-Ac or  $\alpha$ -T-P on the upper disc surface in order to achieve a final concentration of 5 mg/cm<sup>2</sup>. Uncoated discs were used as controls. Subsequently, a bacterial overnight culture was resuspended in BHI at a density of  $1.0 \times 10^7$  CFU/mL, and 400  $\mu\text{L}$  of microbial suspension

was inoculated onto coated and uncoated discs. The test was performed in triplicate for each strain. After 30, 60 and 120 min of incubation, discs were rinsed twice by submersion in 5 mL of sterile saline to remove non-adherent bacteria. Then, discs were immersed in 5 ml of a solution of 0.1% w/v dithiothreitol (DTT; Sigma-Aldrich, Milan, Italy) and mechanically stirred for 15 min at room temperature to detach bacteria adhered to the discs [18]. Proper dilutions of the obtained fluids were plated onto TSA and incubated at 37°C in aerobic atmosphere for 24 h for CFU count.

### Prevention of biofilm formation on sandblasted titanium

The ability of  $\alpha$ -T-Ac or  $\alpha$ -T-P to prevent biofilm development was assessed after chemical detachment of bacterial cells followed by conventional plate counting (CFU method). To evaluate the barrier effect of the two compounds, titanium discs were coated with 5 mg/cm<sup>2</sup> of  $\alpha$ -T-Ac or  $\alpha$ -T-P, as described above, and then used as substrate for biofilm formation. Uncoated discs were used as controls. A bacterial overnight culture was resuspended in BHI at a density of  $1.5 \times 10^8$  CFU/mL, and 200  $\mu$ L of microbial suspension was inoculated into sterile 6-wells polystyrene plates containing coated and uncoated discs immersed in 4.8 mL of BHI. Plates were incubated at 37°C in aerobic atmosphere for 24 and 48 h. The test was performed in triplicate for each strain. At the end of incubation, discs were washed with sterile normal saline and then treated with DTT as described above. Cells detached from biofilm were seeded onto TSA and incubated at 37°C in aerobic atmosphere for 24 h for CFU count.

### Statistical analysis

Results were expressed as mean  $\pm$  standard deviation (SD). Assessment of normality was performed by using Kolmogorov-Smirnov test. Comparisons were carried out by means of two-way ANOVA followed by Tukey's post-hoc tests. A value of P equal or less than 0.05 was used as threshold for statistical significant differences.

## Results

### Evaluation of the antimicrobial activity

Full MIC and MBC data are displayed in Table 1. Only  $\alpha$ -T-P displayed antimicrobial activity against the tested strains, while the acetate form was ineffective at the tested concentrations. *P. acnes* seemed to be the most susceptible microorganism to  $\alpha$ -T-P, with MIC values ranging from 0.20 to 1.60 mg/mL. MIC values for *S. epidermidis* and *S. aureus* were more variable (3.20–100 mg/mL and 25–100 mg/mL, respectively). *P. aeruginosa* was the least susceptible species among the tested microorganisms, with MIC values varying from 100 to 200 mg/mL.  $\alpha$ -T-P was also found to be bactericidal against *P. acnes*, *S. epidermidis* and *S. aureus*, but not against *P. aeruginosa*. Excluding *P. aeruginosa*, 53% of the isolates showed MBCs equal to MICs, while the rest were characterized by MBCs 2–8 times higher than the corresponding MIC.

### Evaluation of the anti-adhesive activity

The results of the anti-adhesive activity of the two tested compounds are shown in Fig 1.

$\alpha$ -T-Ac caused a significant decrease in adhesion of *S. epidermidis* at 60 min and 120 min. *S. aureus* adhesion was significantly decreased only after 30 min, while ability of *P. aeruginosa* to adhere to titanium discs was not affected by treatment with  $\alpha$ -T-Ac.

For all the tested strains,  $\alpha$ -T-P elicited a higher decrease in the amount of adhered cells than  $\alpha$ -T-Ac. Major effects were seen against *S. epidermidis*, where adhesion was almost totally

**Table 1. MIC and MBC values of  $\alpha$ -tocopheryl phosphate and  $\alpha$ -tocopheryl acetate.**

|                       | $\alpha$ -tocopheryl phosphate |       | $\alpha$ -tocopheryl acetate |      | Resistance to conventional antibiotics                    |
|-----------------------|--------------------------------|-------|------------------------------|------|-----------------------------------------------------------|
|                       | MIC                            | MBC   | MIC                          | MBC  |                                                           |
| <i>S. aureus</i>      |                                |       |                              |      |                                                           |
| Strain 1              | 25                             | 25    | >200                         | >200 | -                                                         |
| Strain 2              | 25                             | 25    | >200                         | >200 | -                                                         |
| Strain 3              | 100                            | 100   | >200                         | >200 | Methicillin                                               |
| Strain 4              | 100                            | 100   | >200                         | >200 | Methicillin                                               |
| Strain 5              | 100                            | 200   | >200                         | >200 | Methicillin, teicoplanin (MIC = 4)                        |
| <i>S. epidermidis</i> |                                |       |                              |      |                                                           |
| Strain 1              | 3.20                           | 25    | >200                         | >200 | Methicillin                                               |
| Strain 2              | 25                             | 100   | >200                         | >200 | Methicillin                                               |
| Strain 3              | 50                             | 100   | >200                         | >200 | Methicillin                                               |
| Strain 4              | 100                            | 100   | >200                         | >200 | Methicillin                                               |
| Strain 5              | 100                            | 100   | >200                         | >200 | Methicillin                                               |
| <i>P. aeruginosa</i>  |                                |       |                              |      |                                                           |
| Strain 1              | 100                            | > 200 | >200                         | >200 | Ceftazidime (MIC = 16), Ciprofloxacin (MIC $\geq$ 4)      |
| Strain 2              | 200                            | > 200 | >200                         | >200 | -                                                         |
| Strain 3              | 200                            | > 200 | >200                         | >200 | Ceftazidime (MIC $\geq$ 64), Ciprofloxacin (MIC $\geq$ 4) |
| Strain 4              | 200                            | > 200 | >200                         | >200 | Ceftazidime (MIC = 16), Ciprofloxacin (MIC $\geq$ 4)      |
| Strain 5              | 200                            | > 200 | >200                         | >200 | -                                                         |
| <i>P. acnes</i>       |                                |       |                              |      |                                                           |
| Strain 1              | 0.20                           | 0.20  | >200                         | >200 | -                                                         |
| Strain 2              | 0.20                           | 0.20  | >200                         | >200 | -                                                         |
| Strain 3              | 0.20                           | 0.80  | >200                         | >200 | -                                                         |
| Strain 4              | 0.40                           | 0.80  | >200                         | >200 | -                                                         |
| Strain 5              | 1.60                           | 3.20  | >200                         | >200 | -                                                         |

Values are expressed as mg/mL.

<https://doi.org/10.1371/journal.pone.0182323.t001>

inhibited (84–95% respect to the control), and *S. aureus* (60–78%). In the case of *P. aeruginosa*,  $\alpha$ -T-P was able to reduce adhesion at the earlier timepoints (7–65% reduction).

When comparing the two esters, the phosphate form was significantly more effective than the acetate one in reducing adhesion of *S. aureus* at all time points. Significant differences between the two formulations were also observed for *S. epidermidis* at 60 and 120 min and *P. aeruginosa* at 30 and 60 min.

### Prevention of biofilm formation

Both  $\alpha$ -T-Ac and  $\alpha$ -T-P showed an inhibitory effect on the development of biofilm on titanium discs by *S. epidermidis* and *S. aureus* (Fig 2). In particular, both esters caused a significant reduction of biofilm formation by *S. epidermidis*, which was statistically significant at 24 and 48 h: 92–97% for  $\alpha$ -T-P and 44–70% for  $\alpha$ -T-Ac. Formation of biofilm by *S. aureus* was inhibited at 24 h by both formulations (100% reduction versus control for  $\alpha$ -T-P, 55% for  $\alpha$ -T-Ac), but only by  $\alpha$ -T-P at 48 h (85% reduction). In the case of *P. aeruginosa*, no effect was seen at the earlier time-point, while biofilm formation was significantly reduced after 48 h by phosphate ester only (49%).

When the inhibitory activity on biofilm formation by the two compounds was compared, a significant difference was observed at 48 h for all the tested strains, with the phosphate ester being the more efficient.

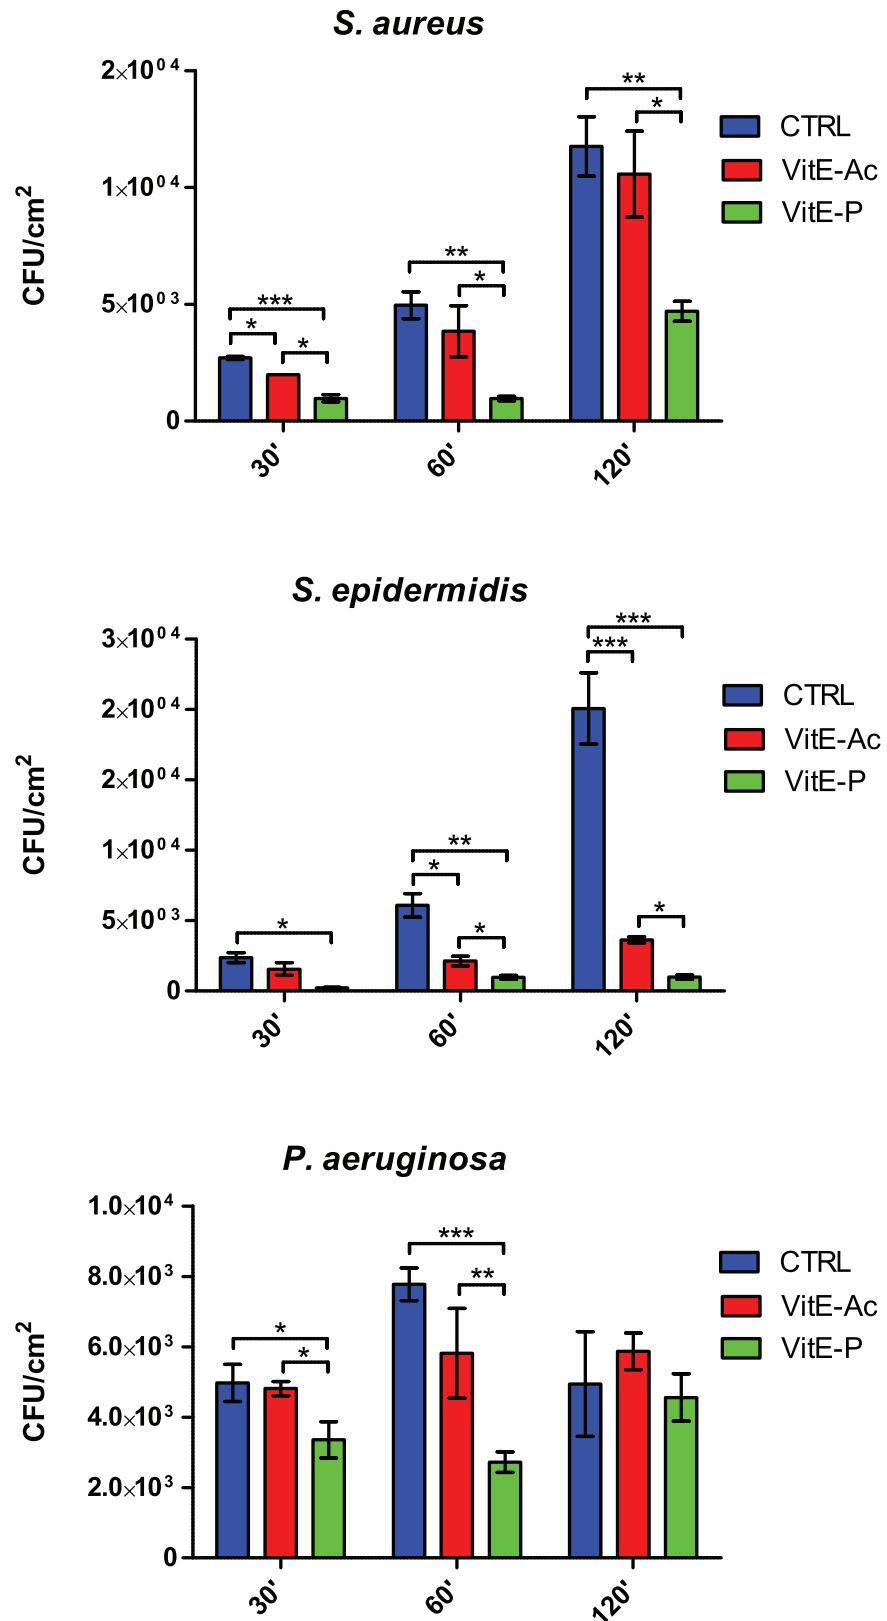

**Fig 1. Anti-adhesive activity of  $\alpha$ -tocopheryl acetate and  $\alpha$ -tocopheryl phosphate.** Blue bars = control; red bars = tocopheryl acetate (5 mg/cm<sup>2</sup>); green bars =  $\alpha$ -tocopheryl phosphate (5 mg/cm<sup>2</sup>). Results are expressed as mean  $\pm$  SD. \*P < 0.05, \*\*P < 0.01, \*\*\*P < 0.001.

<https://doi.org/10.1371/journal.pone.0182323.g001>

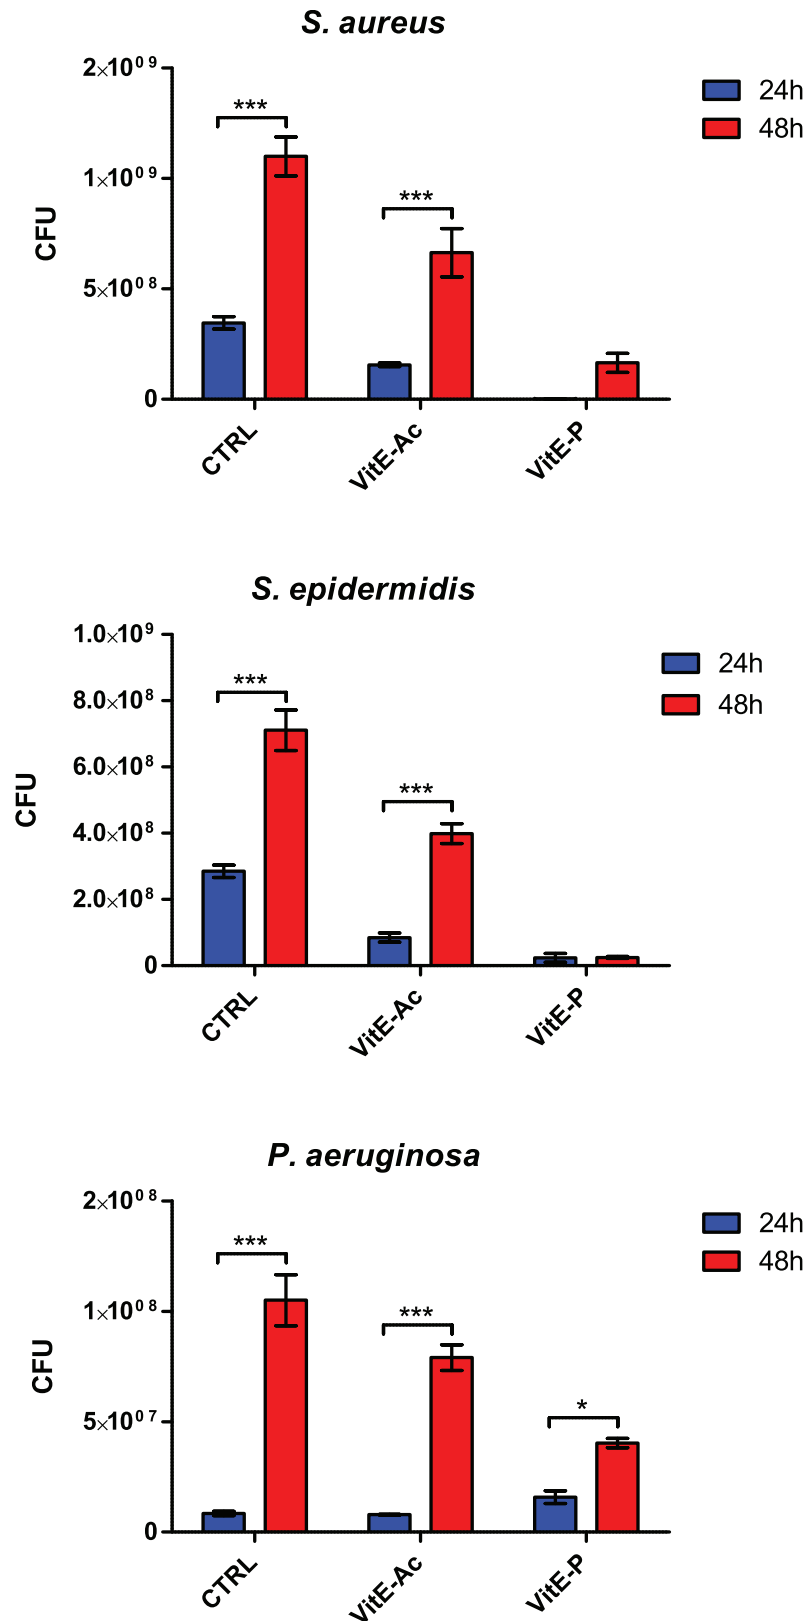

**Fig 2. Prevention of biofilm formation by  $\alpha$ -tocopheryl acetate and  $\alpha$ -tocopheryl phosphate.** Blue bars = control; red bars = tocopheryl acetate (5 mg/cm<sup>2</sup>); green bars =  $\alpha$ -tocopheryl phosphate (5 mg/cm<sup>2</sup>). Results are expressed as mean  $\pm$  SD. \*P < 0.05, \*\*P < 0.01, \*\*\*P < 0.001, \*\*\*\*P < 0.0001.

<https://doi.org/10.1371/journal.pone.0182323.g002>

## Discussion

Implant-related infections represent a recurrent problem after surgeries. The fate of implanted biomaterials can be seen as a “race for the surface” between tissue integration and biofilm formation [19]. The initial phases of biofilm development on biomedical devices are the most critical, as once a biofilm has established on the surface it is difficult to eradicate, because the bacteria residing in the biofilm are protected from the host immune system and from antibiotics. Preventive measures should aim primarily at discouraging biofilm formation by finishing implant material surfaces with repellent coatings. Hence, in recent years, great interest was directed to the identification of new molecules and compounds, compatible with the human body and the implant materials, capable to interfere with pathogens attachment to surfaces [20].

Vitamin E is a group of structurally related compounds with beneficial biological activity on animals and humans.  $\alpha$ -T is the predominant form of vitamin E in most human and animal tissues, including plasma [21,22], and has the highest vitamin E activity for animals and humans [1].

Here we tested two stable forms of  $\alpha$ -T, the viscous and highly hydrophobic acetate ester and the water-soluble phosphate ester, as coatings for titanium prosthesis. To our knowledge, this is the first study evaluating the antimicrobial activity of  $\alpha$ -T-P. In this work,  $\alpha$ -T-P showed a good anti-microbial activity against all the tested stains, although at variable concentrations depending on the microbial species. In our microbiological settings, this antimicrobial activity was always higher compared to that of  $\alpha$ -T-Ac, so that it may be hypothesized that the high hydrophobicity of  $\alpha$ -T-Ac could limit its solubility into the growth medium.

In this work,  $\alpha$ -T-P and  $\alpha$ -T-Ac were evaluated for their ability to either hamper bacterial adhesion and biofilm formation by microorganisms responsible of prosthetic and joints infections such as *S. aureus*, *S. epidermidis* and *P. aeruginosa*. *P. acnes* strains were necessarily excluded from these evaluations because strains from our collection showed a low efficiency to adhere and form biofilm. The amount of Vitamin on the surface of titanium discs was chosen in order to ideally obtain sub-inhibitory concentration for all the tested bacteria.

Bacterial adhesion to substrate represents the first crucial step towards infection and usually occurs during the first hours after invasion of the host tissues. The two vitamin E esters, in particular the phosphate one, have demonstrated a notable anti-adhesive ability against the tested strains of *S. epidermidis* and *S. aureus*. By contrast, ability of *P. aeruginosa* to adhere to titanium discs was only partially affected by  $\alpha$ -T-P, whereas  $\alpha$ -T-Ac was ineffective.

Bacterial adhesion is generally followed by production of biofilm to establish infection. For this reason, we evaluated whether bacteria were able to develop a mature biofilm on vitamin-treated substrates. The amount of biofilm produced on coated and uncoated discs was assessed by CFU count method, as described elsewhere [23,24]. Such method allows an indirect assessment of biofilm by the estimation of the number of viable cells embedded into biofilm. For evaluating biofilm matrix we could not adopt the traditional colorimetric assay [25], because  $\alpha$ -T-P coated on titanium substrates strongly binds crystal violet, thus interfering with spectrophotometric readings.

Both  $\alpha$ -T-Ac and  $\alpha$ -T-P coatings showed an inhibitory effect against the development of biofilm on titanium discs by *S. epidermidis* and *S. aureus*. As observed in the adhesion assay, also in this case the activity of  $\alpha$ -T-P was greater than that observed for  $\alpha$ -T-Ac. Interestingly,  $\alpha$ -T-P caused a reduction in amount of staphylococci embedded in biofilm of more than 90%, thus it may be hypothesized that the rate of persister/tolerant cells could be very low after treatment and subsequent production of biofilm by these cells heavily affected. To evaluate if anti-adhesive and anti-biofilm effects were exerted directly on the surface of titanium discs or due



to the vitamin E dissolved in the medium, we measured  $\alpha$ -T-P and  $\alpha$ -T-Ac concentrations in the broth by means of high-performance liquid chromatography (HPLC), in all the tested conditions (S1 Table). Both  $\alpha$ -tocopherol forms were found in very low amounts in the medium with no significant differences between the two vitamin E forms, meaning that both the formulations remained steadily absorbed to the substrate and did not diffuse into the medium.

Our data confirmed findings of previous works evaluating anti-adhesive properties of  $\alpha$ -T and  $\alpha$ -T-Ac containing biomaterials [6,8,10], even if contrasting results and relevant intraspecies differences were observed in these studies.

Even though Vitamin E is mainly known for its antioxidant properties and for limiting ROS damage of healing tissue, many studies focused on its immunomodulatory capabilities and stimulation of cell proliferation influencing transcriptional activity and cell signaling.

Although contrasting results have been reported [3],  $\alpha$ -T has been shown to be able to stimulate immune cells chemotaxis [26, 27], phagocytosis [28], T-cell-mediated immune functions and macrophage activity [29,30], to modulate cytokines release [31,32], expression of connective tissue growth factor (CTGF) [33] and activation of fibroblasts [34]. Recently,  $\alpha$ -T-P has proved to modulate cellular activities similarly or better than  $\alpha$ -T [35] and new roles such as the induction of VEGF expression and an increasing in vitro angiogenesis have been also observed [16].

For these reasons and because it was found to potentiate the antimicrobial activity of tigecycline and daptomycin against MRSA when tested *in vivo* in mice,  $\alpha$ -T was speculated to act as an immune enhancer possibly by modulating NK cells and leukocytes [31,36]. In the present study, we observed that  $\alpha$ -T-P displays a higher antimicrobial activity than  $\alpha$ -T-Ac and  $\alpha$ -T in the literature. The observed differences between the tocopherols forms may be likely due to the enhanced solubility of the phosphate form compared to  $\alpha$ -T, which makes  $\alpha$ -T-P more suitable to be tested in classic *in vitro* microdilution assay. Indeed, Andrade *et al.* were unable to determine the MIC of  $\alpha$ -T by performing the same microdilution assay. However, the combination of  $\alpha$ -T with aminoglycosides showed a decrease in MIC in respect to the antibiotic alone [37]. The authors suggested that  $\alpha$ -T is able to provoke perturbations in the bacterial membrane, altering its fluidity and making it more susceptible to penetration by various substances, particularly antibiotics. This thesis is supported by the work of Uberos *et al.*, where the presence of  $\alpha$ -T-P caused a reduction of hydrophobicity of the surface of *E. coli*, impacting on the capacity to adhere to nitrocellulose [12]. These alterations at membrane levels may be likely responsible for the interference shown by  $\alpha$ -T-P on bacterial adhesion and biofilm formation found in our study.

## Conclusions

$\alpha$ -T-P and  $\alpha$ -T-Ac are able to significantly interfere with bacterial adhesion and to prevent biofilm formation, especially by *S. aureus* and *S. epidermidis*, generally considered the most frequent pathogens responsible of prosthetic joint infections. In our experiments, only  $\alpha$ -T-P has been seen to have a direct antimicrobial effect. Although further studies are needed to better investigate the mechanisms and the spectrum of activity of  $\alpha$ -T-P and  $\alpha$ -T-Ac, these characteristics, taken together with the positive effect on wound healing and immune response, could make these molecules promising candidate for coatings in order to prevent implant-associated infections and even ameliorate the post-operative course.

## Supporting information

**S1 Table. Concentration of  $\alpha$ -tocopheryl phosphate and  $\alpha$ -tocopheryl acetate dissolved in the medium.**  $\alpha$ -T-P =  $\alpha$ -tocopheryl phosphate;  $\alpha$ -T-Ac =  $\alpha$ -tocopheryl acetate; N.D. = not detectable.

(DOC)

## Author Contributions

**Conceptualization:** Lorenzo Drago.

**Data curation:** Alessandro Bidossi, Monica Bortolin.

**Formal analysis:** Alessandro Bidossi, Monica Bortolin.

**Investigation:** Alessandro Bidossi, Monica Bortolin.

**Methodology:** Alessandro Bidossi, Monica Bortolin, Marco Toscano, Elena De Vecchi.

**Project administration:** Lorenzo Drago.

**Resources:** Lorenzo Drago.

**Supervision:** Elena De Vecchi, Lorenzo Drago.

**Validation:** Elena De Vecchi, Carlo L. Romanò, Roberto Mattina, Lorenzo Drago.

**Visualization:** Alessandro Bidossi, Monica Bortolin.

**Writing – original draft:** Alessandro Bidossi, Monica Bortolin.

**Writing – review & editing:** Marco Toscano, Elena De Vecchi, Carlo L. Romanò, Roberto Mattina, Lorenzo Drago.

## References

1. Brigelius-Flohé R, Traber MG. Vitamin E: function and metabolism. *FASEB J*. 1999; 13: 1145–1155. PMID: [10385606](https://pubmed.ncbi.nlm.nih.gov/10385606/)
2. Smith D, O'Leary VJ, Darley-Usmar VM. The role of alpha-tocopherol as a peroxy radical scavenger in human low density lipoprotein. *Biochem Pharmacol*. 1993; 45: 2195–2201. PMID: [8517860](https://pubmed.ncbi.nlm.nih.gov/8517860/)
3. Hobson R. Vitamin E and wound healing: an evidence-based review. *Int Wound J*. 2016; 13: 331–335. <https://doi.org/10.1111/iwj.12295> PMID: [25124164](https://pubmed.ncbi.nlm.nih.gov/25124164/)
4. Zingg JM, Libinaki R, Lai CQ, Meydani M, Gianello R, Ogru E, et al. Modulation of gene expression by alpha-tocopherol, alpha-tocopheryl phosphate in THP-1 monocytes. *FRBM*. 2010; 49: 1989–2000.
5. Beijersbergen van Henegouwen GM, Junginger HE, de Vries H. Hydrolysis of RRR-alpha-tocopheryl acetate (vitamin E acetate) in the skin and its UV protecting activity (an *in vivo* study with the rat). *J Photochem Photobiol B*. 1995; 29: 45–51. PMID: [7472802](https://pubmed.ncbi.nlm.nih.gov/7472802/)
6. Campoccia D, Visai L, Renò F, Cangini I, Rizzi M, Poggi A, et al. Bacterial adhesion to poly-(D,L)lactic acid blended with vitamin E: toward gentle anti-infective biomaterials. *J Biomed Mater Res A*. 2015; 103: 1447–1458. <https://doi.org/10.1002/jbm.a.35284> PMID: [25046271](https://pubmed.ncbi.nlm.nih.gov/25046271/)
7. Banche G, Allizond V, Bracco P, Bistolfi A, Boffano M, Cimino A, et al. Interplay between surface properties of standard, vitamin E blended and oxidised ultra high molecular weight polyethylene used in total joint replacement and adhesion of *Staphylococcus aureus* and *Escherichia coli*. *Bone Joint J*. 2014; 96-B: 497–501. <https://doi.org/10.1302/0301-620X.96B4/32895> PMID: [24692617](https://pubmed.ncbi.nlm.nih.gov/24692617/)
8. Banche G, Bracco P, Allizond V, Bistolfi A, Boffano M, Cimino A, et al. Do crosslinking and vitamin E stabilization influence microbial adhesions on UHMWPE-based biomaterials? *Clin Orthop Relat Res*. 2015; 473: 974–986. <https://doi.org/10.1007/s11999-014-4024-9> PMID: [25367109](https://pubmed.ncbi.nlm.nih.gov/25367109/)
9. Banche G, Bracco P, Bistolfi A, Allizond V, Boffano M, Costa L, et al. Vitamin E blended UHMWPE may have the potential to reduce bacterial adhesive ability. *J Orthop Res*. 2011; 29: 1662–1667. <https://doi.org/10.1002/jor.21432> PMID: [21520260](https://pubmed.ncbi.nlm.nih.gov/21520260/)
10. Gomez-Barrena E, Esteban J, Molina-Manso D, Adames H, Martinez-Morlanes MJ, Terriza A, et al. Bacterial adherence on UHMWPE with vitamin E: an *in vitro* study. *J Mater Sci Mater Med*. 2011; 22: 1701–1706. <https://doi.org/10.1007/s10856-011-4340-5> PMID: [21574013](https://pubmed.ncbi.nlm.nih.gov/21574013/)
11. Williams DL, Vinciguerra J, Lerdahl JM, Bloebaum RD. Does vitamin E-blended UHMWPE prevent bio-film formation? *Clin Orthop Relat Res*. 2015; 473: 928–935. <https://doi.org/10.1007/s11999-014-3673-z> PMID: [24832828](https://pubmed.ncbi.nlm.nih.gov/24832828/)
12. Uberos J, Augustin C, Liébana J, Molina A, Muñoz-Hoyos A. Comparative study of the influence of melatonin and vitamin E on the surface characteristics of *Escherichia coli*. *Lett Appl Microbiol*. 2001; 32: 303–306. PMID: [11328494](https://pubmed.ncbi.nlm.nih.gov/11328494/)

13. Barton AJ, Sagers RD, Pitt WG. Measurement of bacterial growth rates on polymers. *J Biomed Mater Res.* 1996; 32: 271–278. [https://doi.org/10.1002/\(SICI\)1097-4636\(199610\)32:2<271::AID-JBM17>3.0.CO;2-M](https://doi.org/10.1002/(SICI)1097-4636(199610)32:2<271::AID-JBM17>3.0.CO;2-M) PMID: 8884505
14. Gianello R, Libinaki R, Azzi A, Gavin PD, Negis Y, Zingg JM, et al. Alpha-tocopheryl phosphate: a novel, natural form of vitamin E. *Free Radic Biol Med.* 2005; 39: 970–976. <https://doi.org/10.1016/j.freeradbiomed.2005.05.016> PMID: 16140216
15. Rezk BM, Haenen GRMM, van der Vijgh WJF, Bast A. The extraordinary antioxidant activity of vitamin E phosphate. *Biochim Biophys Acta.* 2004; 1683: 16–21. <https://doi.org/10.1016/j.bbailip.2004.03.005> PMID: 15238215
16. Zingg JM, Meydani M, Azzi A. Alpha-Tocopherol phosphate—An active lipid mediator *Mol Nutr Food Res.* 2010; 54: 679–692. <https://doi.org/10.1002/mnfr.200900404> PMID: 20169583
17. European Committee for Antimicrobial Susceptibility Testing (EUCAST) of the European Society of Clinical Microbiology and infectious Diseases (ESCMID). Determination of minimum inhibitory concentrations (MICs) of antibacterial agents by broth dilution. Available from: [http://www.eucastrg.org/fileadmin/src/media/PDFs/EUCAST\\_files/MIC\\_testing/Edis5.1\\_broth\\_dilution.pdf](http://www.eucastrg.org/fileadmin/src/media/PDFs/EUCAST_files/MIC_testing/Edis5.1_broth_dilution.pdf)
18. Drago L, Romanò CL, Mattina R, Signori V, De Vecchi E. Does dithiothreitol improve bacterial detection from infected prostheses? A pilot study. *Clin Orthop Relat Res.* 2012; 470: 2915–2925. <https://doi.org/10.1007/s11999-012-2415-3> PMID: 22695865
19. Gristina AG, Naylor P, Myrvik Q. Infections from biomaterials and implants: a race for the surface. *Med Prog Technol.* 1988–1989; 14: 205–224.
20. Romanò CL, Scarponi S, Gallazzi E, Romanò D, Drago L. Antibacterial coating of implants in orthopaedics and trauma: a classification proposal in an evolving panorama. *J Orthop Surg Res.* 2015; 10: 157. <https://doi.org/10.1186/s13018-015-0294-5> PMID: 26429342
21. Clement M, Bourre JM. Graded dietary levels of RRR-gamma-tocopherol induce a marked increase in the concentrations of alpha-tocopherol and gamma-tocopherol in nervous tissues, heart, liver, and muscle of vitamin-E-deficient rats. *Biochim Biophys Acta.* 1997; 1334: 173–178. PMID: 9101711
22. Weiser H, Vecchi M, Schlachter M. Stereoisomers of  $\alpha$ -tocopherol equivalents of all-rac-, 2-ambo- and RRR-  $\alpha$ -tocopherol evaluated by simultaneous determination of resorption—gestation, myopathy and liver storage capacity in rats. *Int J Vitam Nutr Res.* 1986; 56: 45–56. PMID: 3710718
23. Slane JA, Vivanco JF, Rose WE, Squire MW, Ploeg HL. The influence of low concentrations of a water soluble poragen on the material properties, antibiotic release, and biofilm inhibition of an acrylic bone cement. *Mater Sci Eng C Mater Biol Appl.* 2014; 42: 168–176. <https://doi.org/10.1016/j.msec.2014.05.026> PMID: 25063107
24. Doll K, Jongstaphongpun KL, Stumpp NS, Winkel A, Stiesch M. Quantifying implant-associated biofilms: Comparison of microscopic, microbiologic and biochemical methods. *J Microbiol Methods.* 2016; 130: 61–68 <https://doi.org/10.1016/j.mimet.2016.07.016> PMID: 27444546
25. Christensen GD, Simpson WA, Younger JJ, Baddour LM, Barrett FF, Melton DM, et al. Adherence of coagulase-negative staphylococci to plastic tissue culture plates: a quantitative model for the adherence of staphylococci to medical devices. *J Clin Microbiol.* 1985; 22: 996–1006. PMID: 3905855
26. Alvarado C, Alvarez P, Puerto M, Gausserès N, Jiménez L, De la Fuente M. Dietary supplementation with antioxidants improves functions and decreases oxidative stress of leukocytes from prematurely aging mice. *Nutrition.* 2010; 22: 767–777.
27. De la Fuente M, Hernanz A, Guayerbas N, Victor MV, Arnalich F. Vitamin E ingestion improves several immune functions in elderly men and women. *Free Radic Res.* 2008; 42: 272–280. <https://doi.org/10.1080/10715760801898838> PMID: 18344122
28. Del Rio M, Ruedas G, Medina S, Victor VM, De la Fuente M. Improvement by several antioxidants of macrophage function in vitro. *Life Sci.* 1998; 63: 871–881. PMID: 9734707
29. Marko MG, Pang HJ, Ren Z, Azzi A, Huber BT, Bunnell SC, et al. Vitamin E reverses impaired linker for activation of T cells activation in T cells from aged C57BL/6 mice. *J Nutr.* 2009; 139: 1192–1197. <https://doi.org/10.3945/jn.108.103416> PMID: 19403707
30. Sakai S, Moriguchi S. Long-term feeding of high vitamin E diet improves the decreased mitogen response of rat splenic lymphocytes with aging. *J Nutr Sci Vitaminol.* 1997; 43: 113–122. PMID: 9151245
31. Pierpaoli E, Cirioni O, Barucca A, Orlando F, Silvestri C, Giacometti A, et al. Vitamin E supplementation in old mice induces antimicrobial activity and improves the efficacy of daptomycin in an animal model of wounds infected with methicillin-resistant *Staphylococcus aureus*. *J Antimicrob Chemother.* 2011; 66: 2184–2185. <https://doi.org/10.1093/jac/dkr254> PMID: 21676901
32. Pallast EG, Schouten EG, de Waart FG, Fonk HC, Doekes G, von Blomberg BM, et al. Effect of 50- and 100-mg vitamin E supplements on cellular immune function in non-institutionalized elderly persons. *Am J Clin Nutr.* 1999; 69: 1273–1281. PMID: 10357750

33. Barbosa FL, Góes RM, de Faria-E-Sousa SJ, Haddad A. Regeneration of the corneal epithelium after debridement of its central region: an autoradiographic study on rabbits. *Curr Eye Res*. 2009; 34: 636–645. PMID: [19899990](https://pubmed.ncbi.nlm.nih.gov/19899990/)
34. Gimeno A, Zaragoza R, Viña JR, Miralles VJ. Vitamin E activates CRABP-II gene expression in cultured human fibroblasts, role of protein kinase C. *FEBS Lett*. 2004; 569: 240–244. <https://doi.org/10.1016/j.febslet.2004.05.073> PMID: [15225641](https://pubmed.ncbi.nlm.nih.gov/15225641/)
35. Negis Y, Aytan N, Ozer N, Ogru E, Libinaki R, Gianello R, et al. The effect of tocopheryl phosphates on atherosclerosis progression in rabbits fed with a high cholesterol diet. *Arch Biochem Biophys*. 2006; 450: 63–66. <https://doi.org/10.1016/j.abb.2006.02.027> PMID: [16579956](https://pubmed.ncbi.nlm.nih.gov/16579956/)
36. Provinciali M, Cirioni O, Orlando F, Pierpaoli E, Barucca A, Silvestri C, et al. Vitamin E improves the *in vivo* efficacy of tigecycline and daptomycin in an animal model of wounds infected with methicillin-resistant *Staphylococcus aureus*. *J Med Microbiol*. 2011; 60: 1806–1812. <https://doi.org/10.1099/jmm.0.032516-0> PMID: [21835971](https://pubmed.ncbi.nlm.nih.gov/21835971/)
37. Andrade JC, Morais-Braga MF, Guedes GM, Tintino SR, Freitas MA, Menezes IR, et al. Enhancement of the antibiotic activity of aminoglycosides by alpha-tocopherol and other cholesterol derivatives. *Biomed Pharmacother*. 2014; 68: 1065–1069. <https://doi.org/10.1016/j.biopha.2014.10.011> PMID: [25458794](https://pubmed.ncbi.nlm.nih.gov/25458794/)
